# Supplementary material
Source: PubMed Central journal article supplement (PMC11029738)
Supplement: 262_2013_1478_MOESM1_ESM.pdf [file 262_2013_1478_MOESM1_ESM.pdf]

**Table S1** Prediction scores of the peptide derived from PL2L60 and its analogues.

| Peptide    | Sequence  | Scores   |        |           |       |
|------------|-----------|----------|--------|-----------|-------|
|            |           | BIMAS    | NetCTL | SYFPEITHI | IEDB  |
| P42        | MLLKGEILL | 134.369  | 1.1977 | 24        | 39.4  |
| P49        | LLPELSFM  | 395.296  | 1.1088 | 24        | 29.0  |
| P56        | FMTGIPEKM | 8.087    | 1.0595 | 16        | 139.0 |
| P274       | ILLQINCKL | 134.369  | 1.1108 | 26        | 151.4 |
| P281       | KLGGELWGV | 4199.202 | 1.3157 | 28        | 5.7   |
| P317       | FVASINLTL |          | 1.3077 | 20        | 32.2  |
| P400       | YQPKMVVFV | 410.344  | 1.1357 | 18        | 25.0  |
| P418       | YLAAPQNFV | 1759.666 | 1.2931 | 26        | 3.0   |
| P522       | QLCENLFFL | 6426.173 | 1.2191 | 26        | 10.7  |
| COX-2_P321 | ILIGETIKI | 17.736   | 1.2064 | 28        |       |

**Table S2** The data of ESI-MS and the HLA-A\*0201 binding affinity and stability of the candidate peptides.

| Peptides               | ESI-MS [M+H] <sup>+</sup> |          | FI <sup>a</sup> | DC 50 <sup>b</sup> |
|------------------------|---------------------------|----------|-----------------|--------------------|
|                        | Calculated                | Observed |                 |                    |
| P42                    | 1029.4                    | 1029.7   | 1.23            | >4 h               |
| P49                    | 1062.3                    | 1060.4   | 0.22            | nd <sup>c</sup>    |
| P56                    | 1053.3                    | 1053.6   | 0.065           | nd <sup>c</sup>    |
| P274                   | 1057.4                    | 1057.8   | -0.19           | nd <sup>c</sup>    |
| P281                   | 958.1                     | 958.3    | 2.42            | >4 h               |
| P317                   | 977.1                     | 977.6    | 0.26            | nd <sup>c</sup>    |
| P400                   | 1110.4                    | 1110.3   | 0.24            | nd <sup>c</sup>    |
| P418                   | 1022.2                    | 1022.7   | 0.2             | nd <sup>c</sup>    |
| P522                   | 1126.3                    | 1126.3   | 0.07            | nd <sup>c</sup>    |
| COX-2_P321             | 999.6                     | 1000.3   | 1.18            | >4 h               |
| HBcAg <sub>18-27</sub> | 1155.3                    | 1155.6   | 1.2             | >6 h               |

<sup>a</sup> FI = [mean fluorescence intensity (MFI) of the peptide–MFI background]/ [MFI background].

<sup>b</sup> DC<sub>50</sub> was defined as the time (h) required for 50% dissociation of the HLA-A\*0201/peptide complex stabilized at t=0 h.

<sup>c</sup> Not determined.

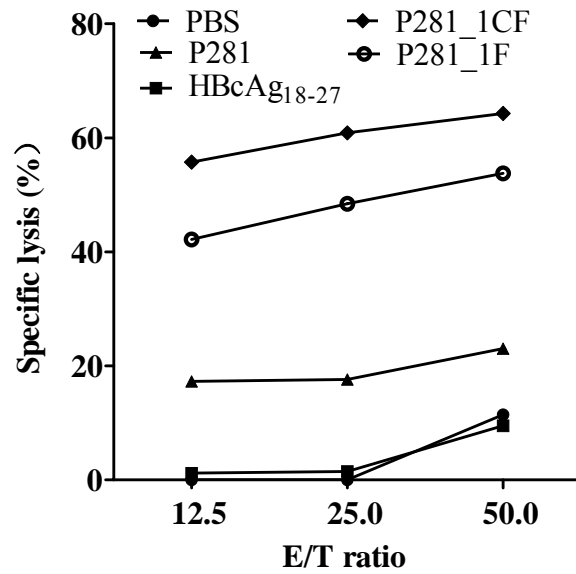

**Fig. S1** Cytotoxicity assay evaluated by using the CFSE fluorescent-based dye. The CTLs induced by each peptide from human PBMCs were used as effector cells. T2 cells were used as control target cells and MCF-7 cells as sensitive target cells. Acquisition was performed using a FACS can analyzer with CellQuest software. The percentage of specific lysis was calculated as follows: % specific lysis = [(number of sensitive target cells in control sample – number of sensitive target cells in test sample / number of sensitive target cells in control sample)] × 100.

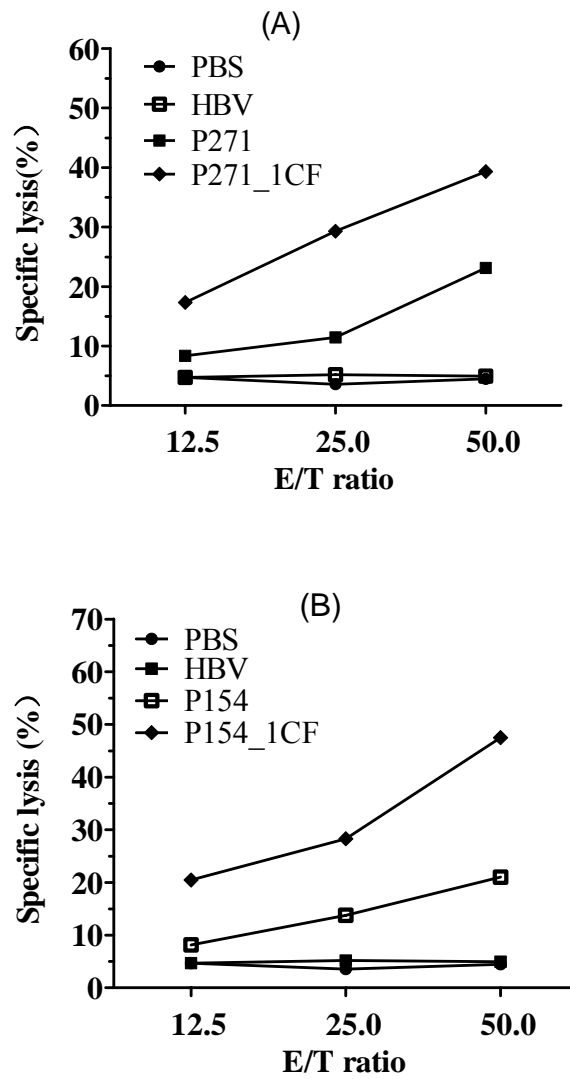

**Fig. S2** The cytotoxic activity of the CTLs induced by (A) P271 (MAGE-3) and its 4-Cl-Phe substituted analogue, or (B) P154 (gp100) and its 4-Cl-Phe substituted analogue. HLA-A2 positive MCF-7 cells (MAGE-3<sup>+</sup>, gp100<sup>+</sup>) were used as target cells.
